# Supplementary material for: An efficient organic–inorganic hybrid hole injection layer for organic light-emitting diodes by aqueous solution doping
Source: Royal Society of Chemistry journal article supplement (doi:10.1039/c5tc00851d), 2015-01-01
Supplement: c5tc00851d1.pdf [file c5tc00851d1.pdf]

## Supporting Information

### **Efficient Organic-Inorganic Hybrid Hole Injection Layer for Organic Light-Emitting Diodes by Aqueous Solution Doping**

Ya-Li Deng, Yue-Min Xie, Lei Zhang, Zhao-Kui Wang,\* and Liang-Sheng Liao\*

Jiangsu Key Laboratory for Carbon-Based Functional Materials & Devices, Institute of Functional Nano & Soft Materials (FUNSOM), and Collaborative Innovation Center of Suzhou Nano Science and Technology, Soochow University, Suzhou, Jiangsu 215123, China

Address all correspondence to the authors. Email: [lsiao@suda.edu.cn](mailto:lsiao@suda.edu.cn); [zkwang@suda.edu.cn](mailto:zkwang@suda.edu.cn)

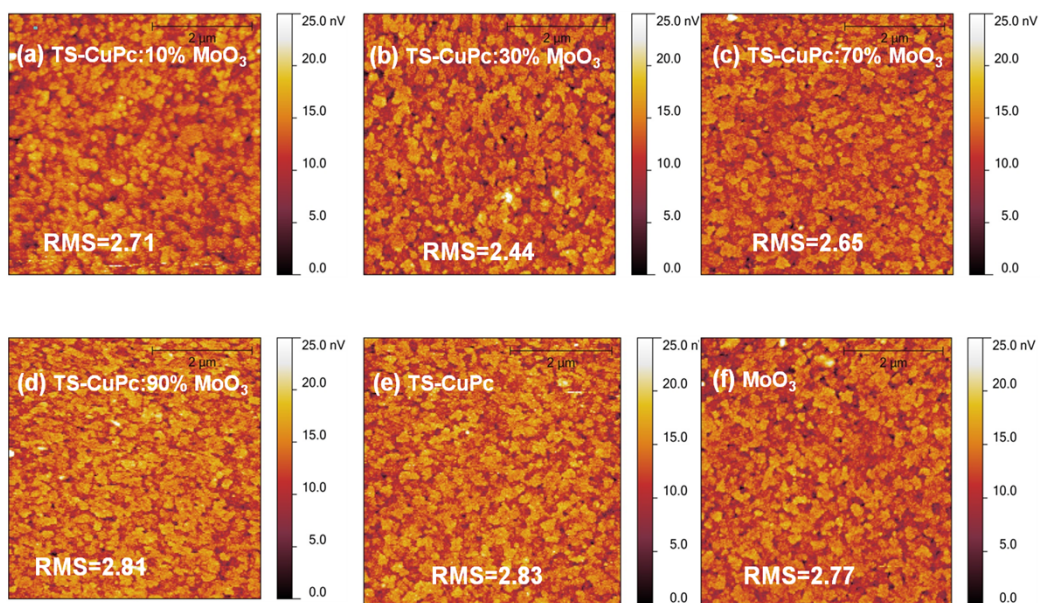

Figure S1 AFM surface image of TS-CuPc, MoO<sub>3</sub>, and MoO<sub>3</sub> doped TS-CuPc films with varied MoO<sub>3</sub> doping concentration.

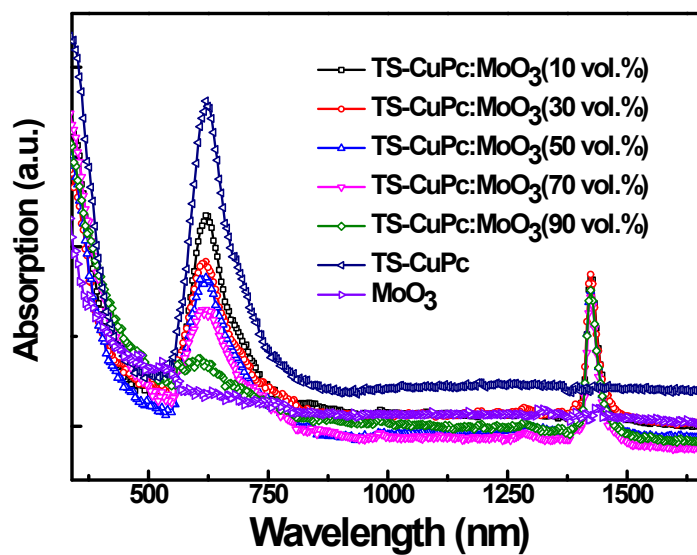

Figure S2 UV/Vis absorption spectra of TS-CuPc, MoO<sub>3</sub>, and MoO<sub>3</sub> doped TS-CuPc films with varied MoO<sub>3</sub> doping concentration.

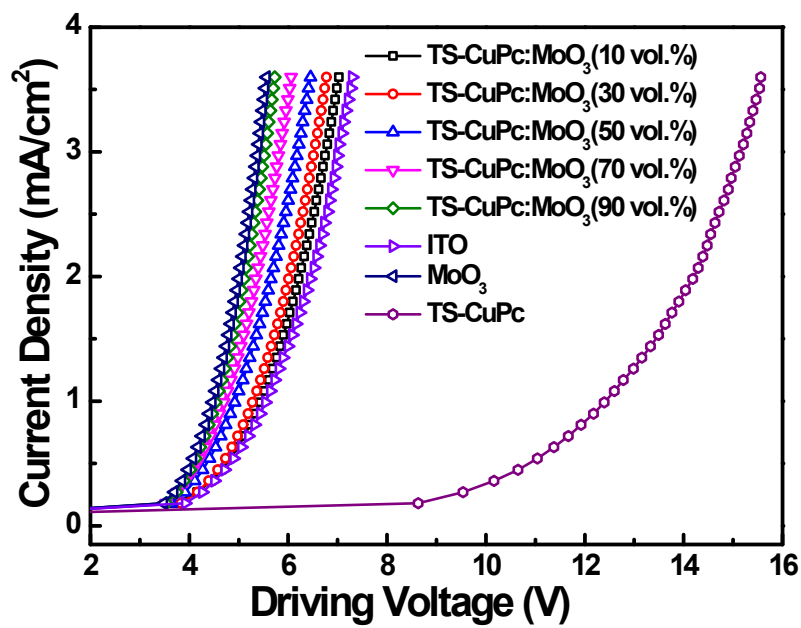

Figure S3  $J$ - $V$  characteristics of Ir(MDQ)<sub>2</sub>acac based OLEDs with pristine TS-CuPc, pristine MoO<sub>3</sub>, and MoO<sub>3</sub> doped TS-CuPc:MoO<sub>3</sub> interfacial layers with different MoO<sub>3</sub> doping concentration.

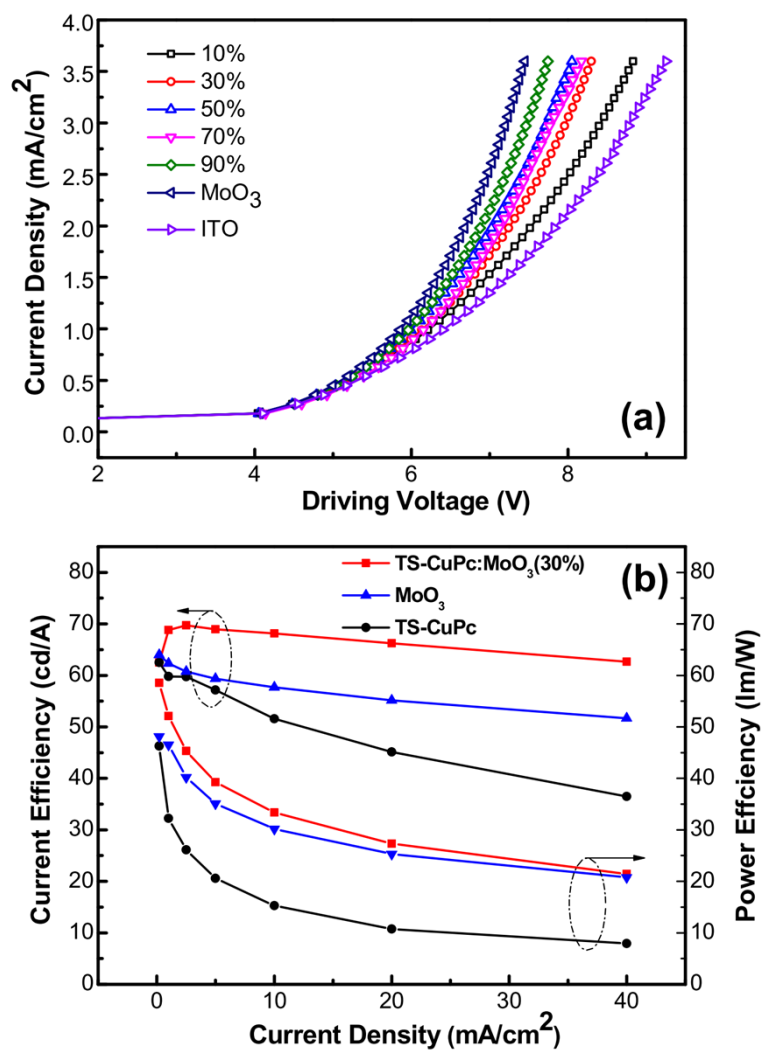

Figure S4 Current efficiency and power efficiency characteristics in different hole interfacial layer based green OLEDs with a structure of ITO/TS-CuPc:MoO<sub>3</sub> (30%) (5.5 nm)/TCTA (45 nm)/TCTA: Ir(ppy)<sub>2</sub>acac 4 wt% (15 nm)/TmPyPB (40 nm)/LiQ (2 nm)/Al (120 nm).
